# Supplementary material for: On some infinite server queues in discrete time
Source: MDPI journal article supplement (doi:10.3390/healthcare11071003), 1996-01-01
Supplement: s1 [file s1]

**Supplementary Materials:**

**Figure S1.** Conceptual framework of “Brain Overwork Syndrome”

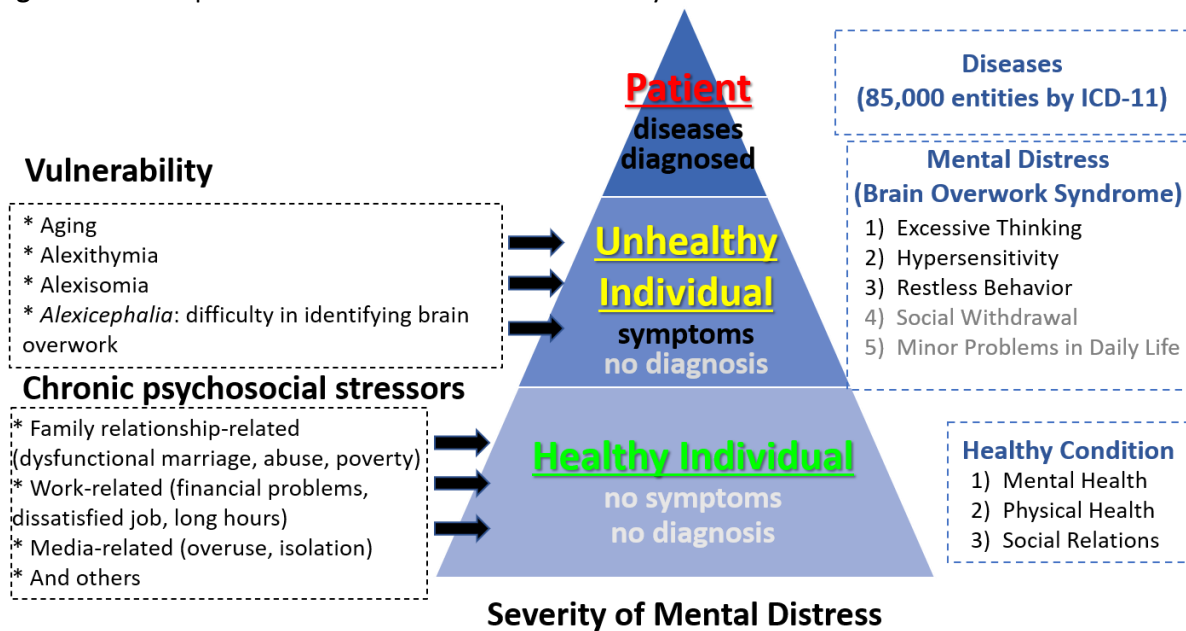

**Figure S1:** Conceptual frameworks “Brain Overwork Syndrome”.

Chronic psychosocial stressors cause mental distress or an abnormal condition that is characterized by the Brain Overwork Syndrome: Excessive Thinking, Hypersensitivity, Restless Behavior, Social Withdrawal, and Minor Problems in Daily Life.

**Figure S2. Study flowchart**

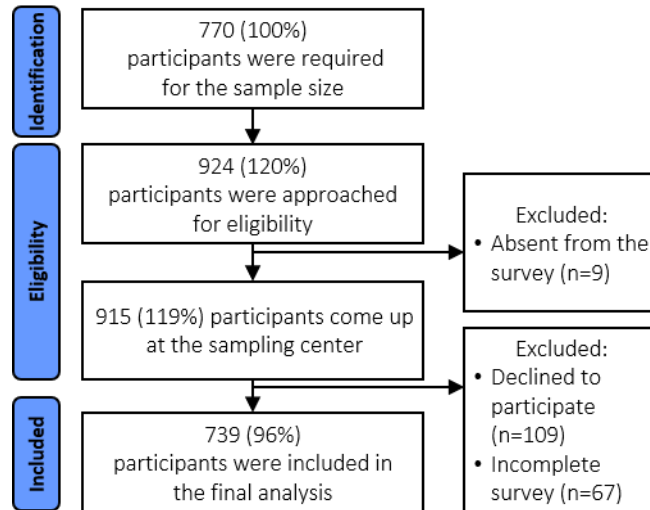

Figure S3. Scatter plot between the BOS-10 total score and age by gender

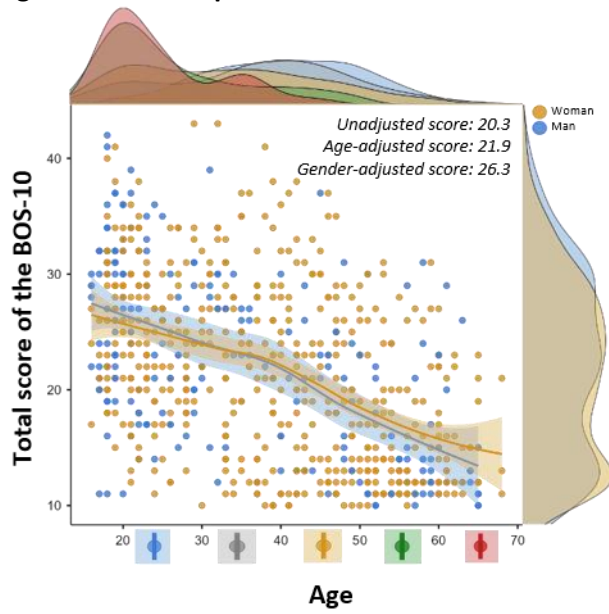

**Figure S4. The means and 95% confidence intervals of the BOS-10**

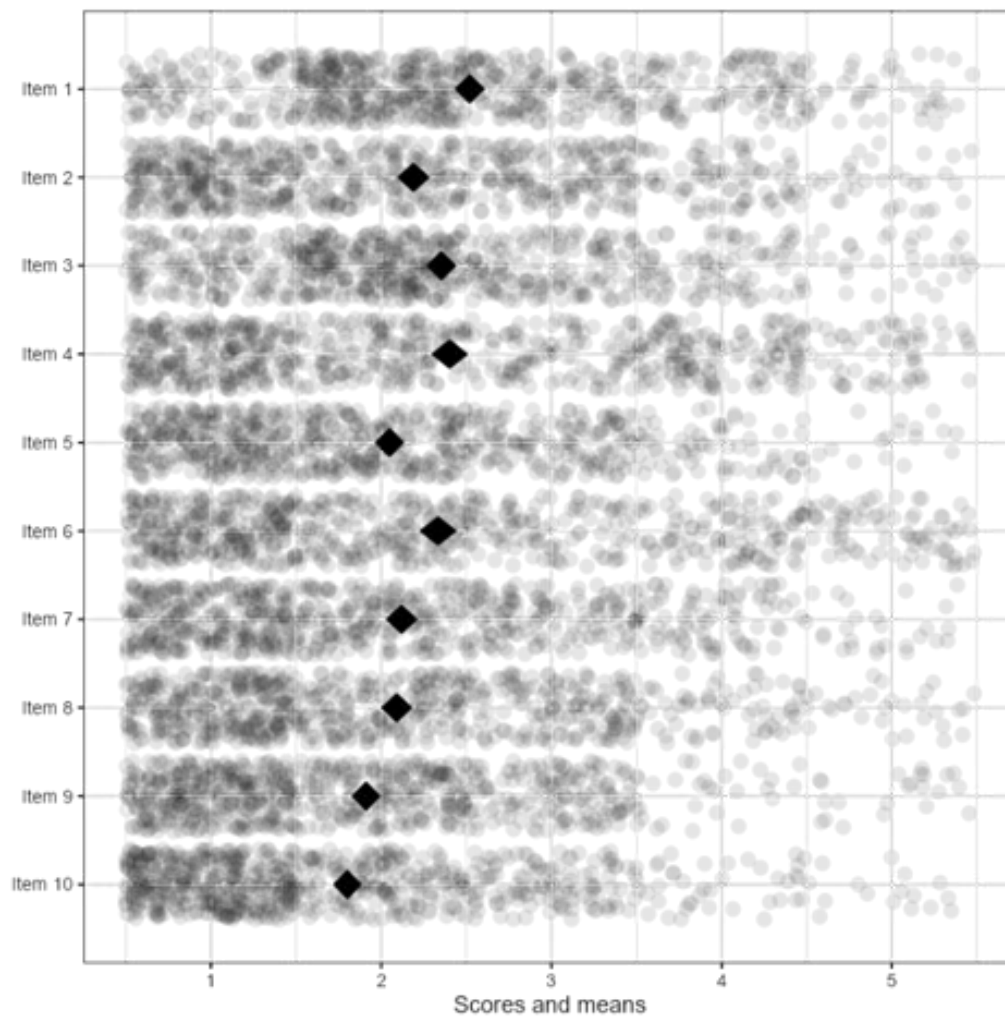

**Table S1: Descriptive statistics of the 37-item Brain Overwork Scale**

Please tell me about your behavior or pattern of thinking in your daily life.

Please tell me how often you have felt or behaved this way during the past week

| Items                                                                 | mean | SD   | skewness | kurtosis |
|-----------------------------------------------------------------------|------|------|----------|----------|
| <b>Domain 1: Excessive thinking (ET)</b>                              |      |      |          |          |
| I had racing thoughts (was thinking something a lot)                  | 2.52 | 1.09 | 0.58     | 2.62     |
| I tended to think about multiple (other) things or tasks when working | 2.24 | 1.20 | 0.65     | 2.37     |
| I tended to think about the past / future                             | 2.49 | 1.33 | 0.41     | 1.93     |
| I tended to overthink even the (most) minor of events                 | 2.35 | 1.08 | 0.66     | 2.77     |
| I tended to stick to one way of doing or thinking about something     | 2.05 | 1.06 | 0.80     | 2.88     |
| <b>Domain 2: Hypersensitivity/brain fatigue (H)</b>                   |      |      |          |          |
| I felt very sensitive to lights and/or sound                          | 2.25 | 1.17 | 0.51     | 2.15     |
| I tended to compare myself to others                                  | 1.85 | 0.99 | 1.04     | 3.40     |
| I was not good at staying in a crowd                                  | 1.88 | 1.01 | 0.95     | 3.15     |
| I felt tired when reading newspapers / magazines                      | 1.80 | 1.02 | 1.18     | 3.68     |
| I felt brain fog (felt my brain was not working well)                 | 2.20 | 1.13 | 0.57     | 2.42     |
| I easily felt tense in public                                         | 2.09 | 1.14 | 0.81     | 2.78     |
| I felt that others were watching me                                   | 1.91 | 1.03 | 1.05     | 3.62     |
| <b>Domain 3: Restless behavior (RB)</b>                               |      |      |          |          |
| I did not like to have leisure time                                   | 2.19 | 1.18 | 0.64     | 2.39     |
| I felt like I was pressed for time                                    | 2.12 | 1.17 | 0.75     | 2.52     |
| I tended to walk or move fast                                         | 2.40 | 1.36 | 0.47     | 1.85     |
| I was not good at waiting                                             | 2.33 | 1.37 | 0.65     | 2.11     |
| I tended to rush when completing a task (e.g. household chores)       | 1.96 | 1.04 | 0.94     | 3.20     |
| I would tell myself to not waste time                                 | 2.33 | 1.33 | 0.54     | 2.03     |
| My notebook was full of schedules                                     | 2.12 | 1.16 | 0.73     | 2.51     |
| I could not stay still (had such characteristic)                      | 1.60 | 0.94 | 1.58     | 4.87     |
| <b>Domain 4: Social withdrawal (SW)</b>                               |      |      |          |          |
| I tended to refrain from asking others for help                       | 1.91 | 1.05 | 1.02     | 3.29     |
| I was not good at relying on other people                             | 2.05 | 1.07 | 0.72     | 2.65     |
| I tended to prioritize others over myself                             | 2.08 | 1.14 | 0.69     | 2.38     |
| I was not good at rejecting requests from others                      | 2.34 | 1.29 | 0.49     | 1.96     |
| I was not good at sharing my complaints with others                   | 2.11 | 1.17 | 0.74     | 2.50     |
| I tended to listen to others when talking                             | 2.80 | 1.47 | -0.02    | 1.50     |
| <b>Domain 5: Minor problems in daily life (MP)</b>                    |      |      |          |          |
| I had stiffness (felt heavy) in my neck / shoulders                   | 2.75 | 1.16 | 0.30     | 2.15     |
| I had heartburn                                                       | 1.84 | 1.04 | 1.15     | 3.60     |
| I had an upset stomach after a meal                                   | 1.78 | 0.90 | 1.10     | 3.94     |
| I had night sweats                                                    | 1.49 | 0.84 | 1.96     | 6.85     |
| I felt tired when waking up                                           | 2.35 | 1.11 | 0.55     | 2.54     |
| I felt hot headed                                                     | 1.69 | 0.97 | 1.41     | 4.40     |
| I had a headache                                                      | 2.62 | 1.14 | 0.21     | 2.10     |
| <b>Control questions (reverse questions)</b>                          |      |      |          |          |
| I had enough time to relax                                            | 3.32 | 1.04 | -0.50    | 2.40     |
| I had enough time to stay healthy                                     | 2.94 | 0.99 | 0.08     | 2.59     |
| I slept well                                                          | 3.10 | 1.22 | -0.30    | 2.03     |
| I regularly exercised                                                 | 2.11 | 1.10 | 0.87     | 3.04     |

BOS: Brain Overwork Scale; 1: very inaccurate / never (0 day per week), 2: moderately inaccurate / rarely (1-2 day(s) per week), 3: neutral / Sometimes (3-4 days per week), 4: moderately accurate / frequently (5-6 days per week), 5: very accurate / always (7 days per week).
